# Supplementary material for: Effects of the ApoE genotype on cognitive function in aging mice fed with a high-fat diet and the protective potential of n-3 polyunsaturated fatty acids
Source: Royal Society of Chemistry journal article supplement (doi:10.1039/d3fo03965j), 2024-01-01
Supplement: d3fo03965j1.pdf [file d3fo03965j1.pdf]

## Supplementary information

### Effects of ApoE Genotype on Cognitive Function in Aging Mice Fed with High-Fat Diet and the Protective Potential of n-3 Polyunsaturated Fatty Acids

*Xin Zhang*<sup>#1</sup>, *Tianzhi Xie*<sup>#1</sup>, *Shuang Zhou*<sup>#1</sup>, *Yingxuan Yuan*<sup>1</sup>, *Weixuan Chen*<sup>1</sup>, *Tian Yuan*<sup>5</sup>, *Xuebo Liu*<sup>1</sup>, *Zhigang Liu*<sup>\*1,2,3,4</sup>

*1 Laboratory of Functional Chemistry and Nutrition of Food, College of Food Science and Engineering, Northwest A&F University, Yangling, Shaanxi 712100, China*

*2 Northwest A&F University Shenzhen Research Institute, Shenzhen, Guangdong, 518000, China.*

*3 Dongguan Chuangwei Precision Nutrition and Health Innovation Center, Dongguan, Guangdong, 523170, China.*

*4 Shaanxi Precision Nutrition and Health Research Institute, Xi'an, Shaanxi, 710300, China.*

*5 Shaanxi Key Laboratory of Natural Products & Chemical Biology, College of Chemistry & Pharmacy, Northwest A&F University, Yangling, Shaanxi 712100, China.*

# These authors contributed equally to this work.

\* Corresponding author: Dr. Zhigang Liu, E-mail: [Zhigangliu@nwsuaf.edu.cn](mailto:Zhigangliu@nwsuaf.edu.cn)

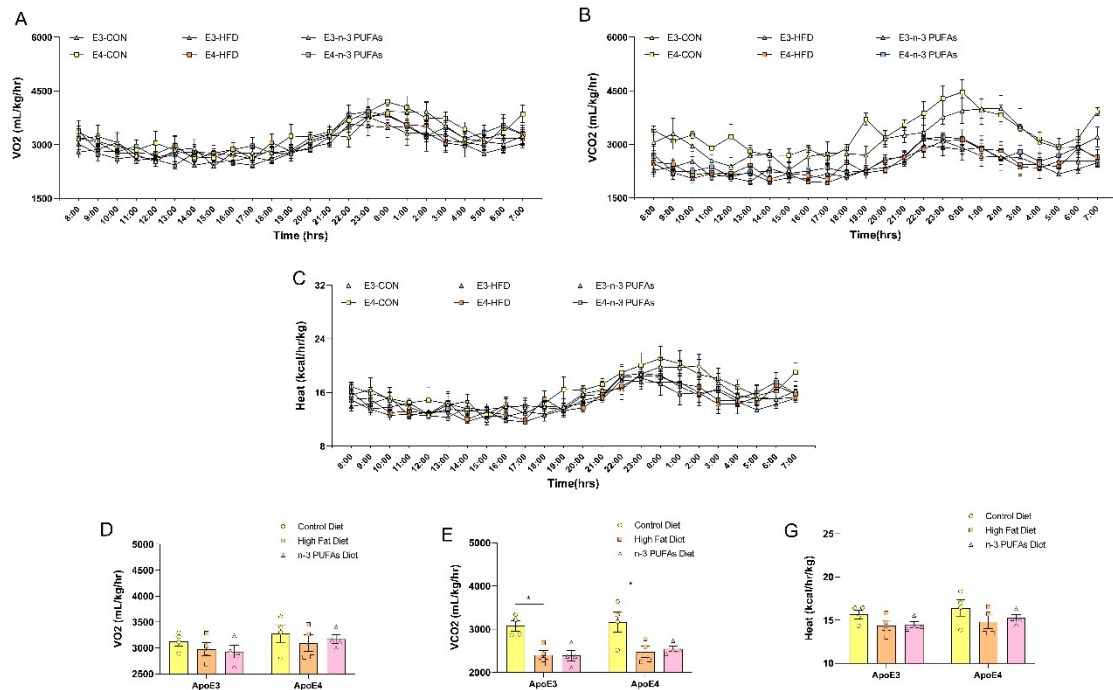

**Supplementary Figure 1** *Effects of n-3 PUFAs Supplementation on Energy Metabolism in HFD-induced ApoE3 and ApoE4 Aging Mice*

(A) The curve of oxygen consumption and (B) carbon dioxide production. (C) The curve of heat production change; (D-F) Quantitative analysis of oxygen consumption, carbon dioxide production and heat production during the 24 h test period. Data presented as mean ± SEM and were analyzed using two-way ANOVA with Tukey's test. \* $p < 0.05$ , \*\* $p < 0.01$ .

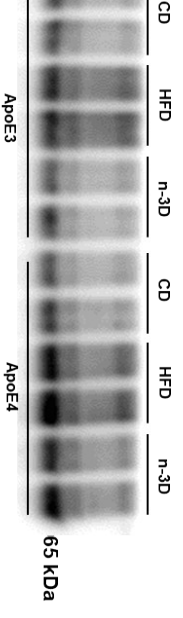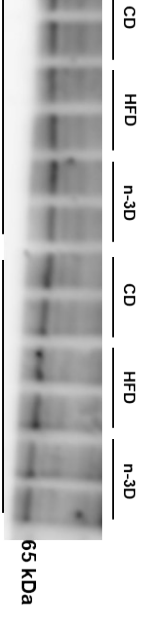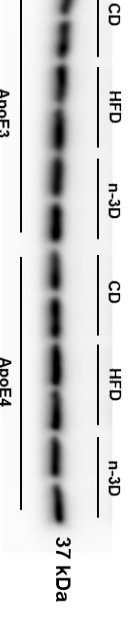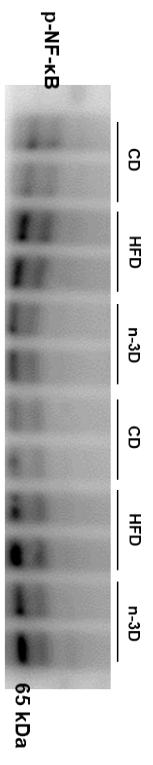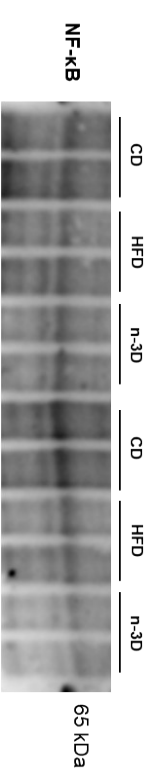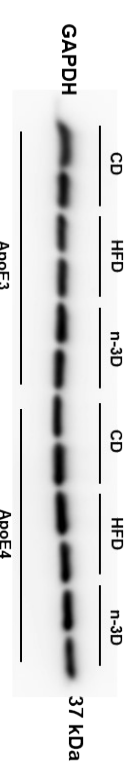

p-IRS-1  
(Ser307)

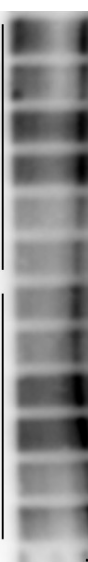

p-IRS-1  
(Ser307)

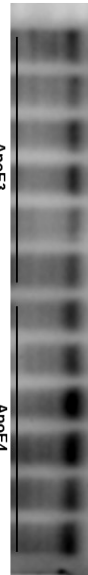

180 kDa

IRS-1

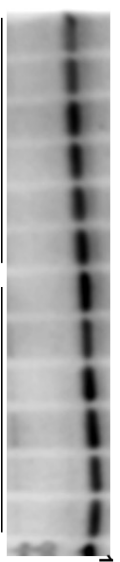

IRS-1

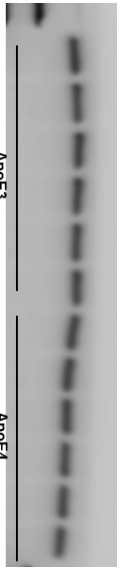

180 kDa

p-AKT  
(Ser473)

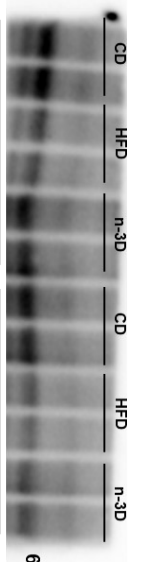

p-AKT  
(Ser473)

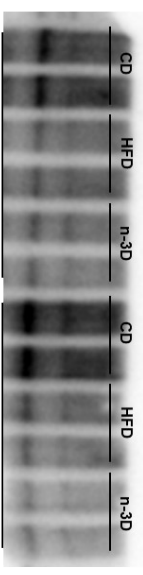

60 kDa

AKT

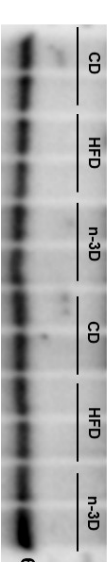

AKT

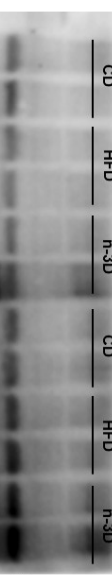

60 kDa

GLUT4

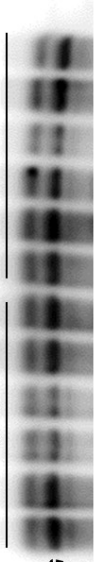

GLUT4

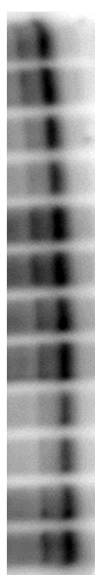

54 kDa

GAPDH

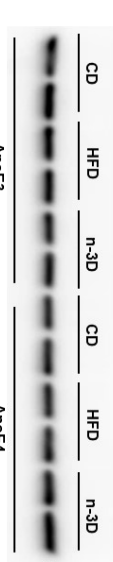

GAPDH

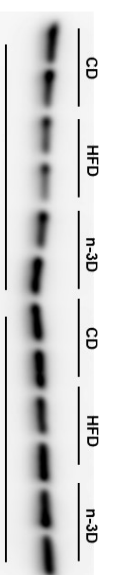

37 kDa
